# Supplementary material for: Complexes of Soluble Dietary Fiber and Polyphenols from Lotus Root Regulate High-Fat Diet-Induced Hyperlipidemia in Mice
Source: MDPI journal article supplement (doi:10.3390/antiox13040466), 2024-04-16
Supplement: s1 [file s1]

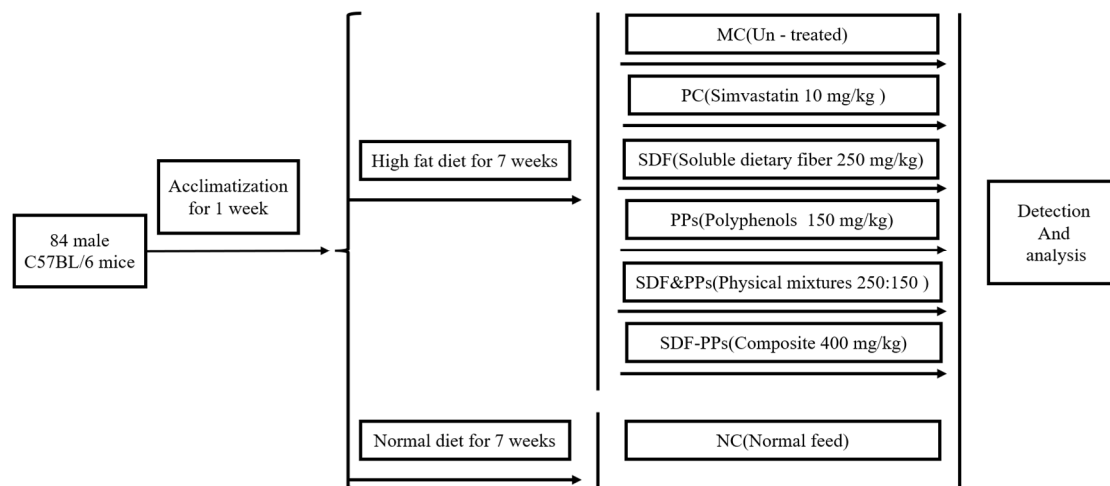

**Figure S1.** The animal experimental design; normal control group (NC); model control group (MC); positive control group (simvastatin 10 mg/kg, PC); soluble dietary fiber group (250 mg/kg, SDF); polyphenols group (150 mg/kg, PPs); physically mixing group (250:150 ratio of blended, SDF&PPs); composite group (400 mg/kg, SDF-PPs).

**Table S1.** Primer sequence.

| Gene       | Primer  | Sequence (5'-3')          | PCR Products | NCBI Accession No. |
|------------|---------|---------------------------|--------------|--------------------|
| MusGAPDH   | Forward | ATGGGTGTGAACCACGAGA       | 229bp        | NM_001289726.2     |
|            | Reverse | CAGGGATGATGTTCTGGGCA      |              |                    |
| MusHGM-COA | Forward | GAGATCATGTGCTGCTTCGG      | 194bp        | NM_001360165.1     |
|            | Reverse | CTTTGGGTTACGGGGTTTGG      |              |                    |
| MusABCA1   | Forward | CAATGATTTGATGAAGAACTTGGAG | 106bp        | NM_0.13454.3       |
|            | Reverse | TGGTGTGTCAGGTGTATAGAGA    |              |                    |
| MusACC1    | Forward | ACCGTCTGCTGGGAAGTTAA      | 179bp        | NM_001198214.2     |
|            | Reverse | CTATCACACAGCCAGGGTCA      |              |                    |
| MusFAS     | Forward | GTCCTGCCTCTGGTGCTT        | 168bp        | NM_001146708.1     |
|            | Reverse | TTCAGGTTGGCATGGTTGAC      |              |                    |
| MusLXRa    | Forward | CACTACCCACTCTAACG         | 107bp        | NM_001177730.1     |
|            | Reverse | TCTTCCCTTGACTCCT          |              |                    |
| MusSREBP-1 | Forward | GCAGTGGTGGTAGTGACTCT      | 152bp        | NM_001313979.1     |
|            | Reverse | AGGATTGCAGGTCAGACACA      |              |                    |
